# Supplementary material for: Extracellular Signal-Regulated Kinase 1/2 Signaling Pathway Is Required for Endometrial Decidualization in Mice and Human
Source: PubMed Central journal article supplement (PMC3782496; doi:10.1371/journal.pone.0075282), 2013-09-24

# Figure S2

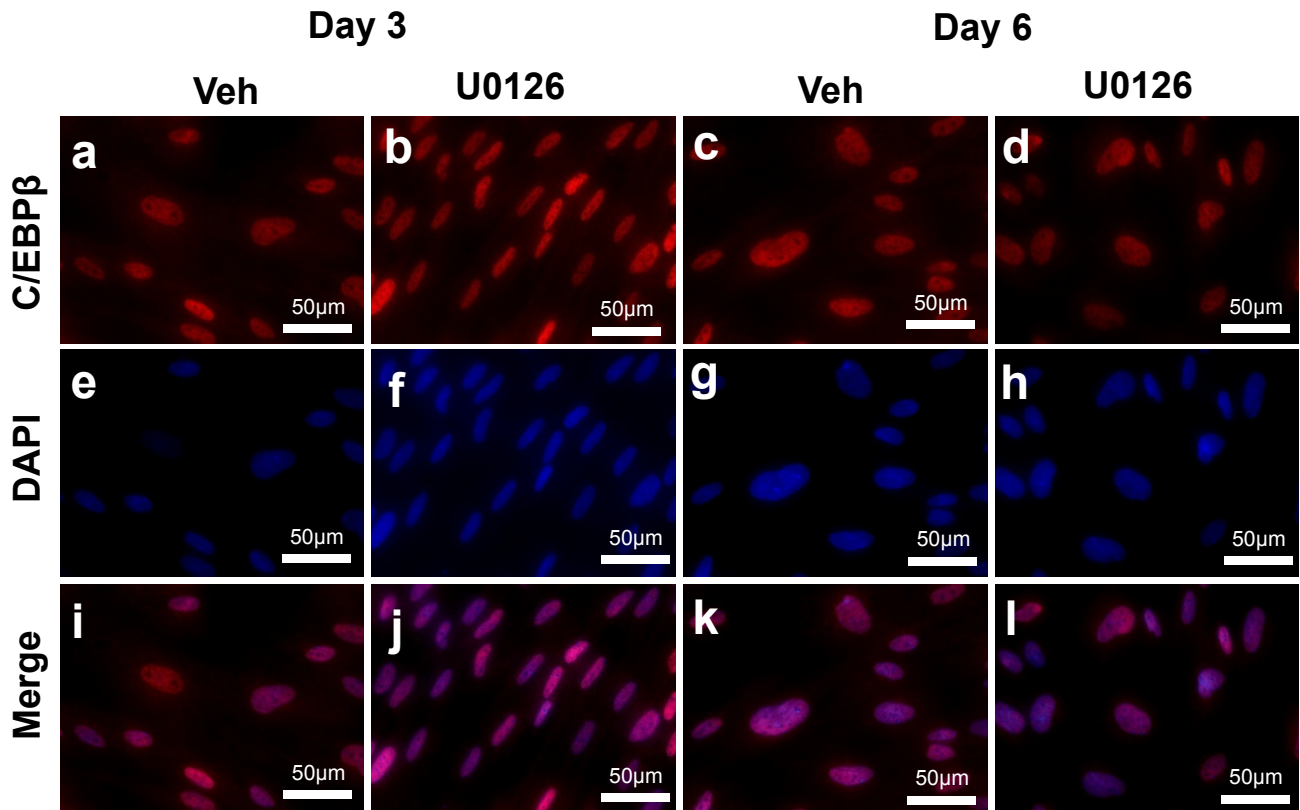

Supplement: pone.0075282.s002.pdf [file pone.0075282.s002.pdf]
